# Supplementary material for: Epidemiology, genetics, and subtyping of preserved ratio impaired spirometry (PRISm) in COPDGene
Source: PubMed Central journal article supplement (PMC4256936; doi:10.1186/s12931-014-0089-y), 2014-08-06
Supplement: 12931_2014_89_MOESM1_ESM.pdf [file 12931_2014_89_MOESM1_ESM.pdf]

**Epidemiology, Genetics, and Subtyping of Subjects with Preserved Ratio Impaired Spirometry (PRISm) in COPDGene**

**Additional Files**

Emily S. Wan, MD; Peter J. Castaldi, MD; Michael H. Cho, MD; John E. Hokanson, PhD; Elizabeth A. Regan, MD, PhD; Barry J. Make, MD; Terri H. Beaty, PhD; MeiLan K. Han, MD; Jeffrey L. Curtis, MD; Douglas Curran-Everett, PhD; David A. Lynch, MD; Dawn L. DeMeo, MD; James D. Crapo, MD; Edwin K. Silverman, MD, PhD; and the COPDGene Investigators

## **Additional Methods**

### *Study Population*

Race and ethnicity data were collected as part of the COPDGene Study. Subjects were asked to self-identify their race and ethnicity based on the investigator-defined categories of non-Hispanic white and African American. These data were necessary for the analysis of genetic risk factors for chronic respiratory diseases. The following institutional review boards (IRB) approved the COPDGene study: Partners IRB, Ann Arbor VA Research IRB, Baylor University IRB, Columbia University Medical Center IRB, Duke University Health System IRB, Health Partners IRB, Johns Hopkins Medicine IRB, Harbor UCLA Medical Center IRB, Michael E. DeBakey VA Medical Center IRB, Minneapolis VA Health Care System IRB, Morehouse School of Medicine IRB, National Jewish Health IRB, Temple University IRB, University of Alabama IRB, University of California San Diego Human Research Protections Program, University of Iowa IRB, University of Michigan Medical School IRB, University of Minnesota IRB, University of Pittsburgh IRB, Office of the IRB University of Texas Health Science Center San Antonio.

### *Variable definitions*

Medication lists were constructed during the subject interview, and then classes of respiratory medications were designated by the research coordinator. For this analysis, we focused on short-acting beta-agonists (SABA), long-acting beta agonists (LABA), inhaled corticosteroids (ICS), and oral corticosteroids. Bronchodilator responsiveness was considered present if the change in FEV<sub>1</sub> or FVC was  $\geq 200$  mL and  $\geq 12\%$  change from baseline following administration of a short-acting inhaled beta-agonist. Chronic bronchitis was considered present if subjects reported a cough productive of phlegm on most days for 3 consecutive months for at least 2 years. Comorbid conditions were assessed by self-report on a standardized questionnaire. Coronary artery disease was considered present if the subject reported a history of coronary artery disease, coronary artery bypass grafting, angioplasty, heart attack, or angina.

Total lung capacity ( $TLC_{CT}$ ) in liters was calculated from volumetric CT measurements at full inspiration; percent predicted values were calculated from published references[1, 2]. Percent emphysema was calculated as the percentage of voxels within the lung with an attenuation  $< -950$  Hounsfield units at full inspiration ( $\%LAA-950_{insp}$ ). Gas trapping was defined as the percentage of lung with an attention less than  $-856$  HU on expiratory chest computed tomography. Segmental wall area was determined from quantitative airway measurements made at the fourth generation bronchi. Pi10 is a standardized variable which describes the wall thickness of a hypothetical airway with an internal perimeter of 10mm; the value is extrapolated by plotting the square root of multiple airway wall measurements against the internal perimeter of the airway[3].

#### *Epidemiological analysis*

Stepwise selection as implemented in SAS (v 9.3, Cary, NC) was used determine significant variables in the multivariate regressions[4]. User-specified significance levels for entry into and retention in the model were 0.1 and 0.05, respectively. For stepwise regression, an intercept-only model is computed and score statistics are assigned to each candidate variable. The variable with the most significant score meeting the threshold for entry into the model is added first; if the candidate variable remains significant (i.e. – less than the user-specified level for retention in the model), it is not removed and the next most significant candidate variable is entered in to the model. This is performed iteratively until no additional candidate variables meet the significance level for entry into the model. Variables not retained in the final multivariate model were reintroduced into the final model and the impact on the effect estimate (i.e. odds ratio) of significant (retained) variables was ascertained; non-significant variables which caused a +/- 10% change in the effect estimate of significant variables were considered confounders and were retained in the final model.

#### *Genetic data processing*

Quality control and pre-processing of genetic data by sample and by probe in this cohort have been previously described[5]. Gender checking was performed by examining the mean intensity of SNPs on the X and Y chromosomes against the self-reported gender from questionnaire data.

### *Cluster analysis*

For the unsupervised k-means clustering analysis, we used percent predicted values for total lung capacity derived using published references[1, 2] and log transformed percent emphysema at -950 HU + 1. All input variables were normalized prior to clustering; clustering was performed using the *kmeans* function in R (release 2.15.0)[6] using the default method of Hartigan and Wong[7], 50 starting centers, and 10 maximum iterations. In k-means clustering, the number of clusters is fixed by the user. An initial set of aggregation centers, or seeds, are determined and a distance measure (often Euclidean distance) for each data point to each of the centers is computed. Each data point is assigned to the nearest seed and the cluster center is recomputed. Each data point is then reassigned by distance measure to the new cluster centers. This process is repeated iteratively until no reclassification is necessary and clusters are presumed stable.

## Additional Results

**Additional File - Table S1** – Rates of respiratory medication use by history of physician-diagnosed asthma and bronchodilator responsiveness\* among fixed-threshold defined *Preserved Ratio Impaired Spirometry* (PRISm) subjects ( $n_{\text{total}} = 1,257$ )

| Medication                 | Percent of subjects reporting medication use with concurrent: |                                |
|----------------------------|---------------------------------------------------------------|--------------------------------|
|                            | Physician diagnosed asthma                                    | Bronchodilator responsiveness† |
| Inhaled corticosteroids    | 53.4%                                                         | 20.6%                          |
| Short-acting beta agonists | 51.3%                                                         | 21.8%                          |
| Long-acting beta agonists  | 49.1%                                                         | 18.7%                          |

\*Bronchodilator responsiveness defined as an increase  $\geq 200\text{mL}$  and  $>12\%$  in FEV<sub>1</sub> or FVC following administration of short acting bronchodilator

† n = 1240 (17 subjects missing bronchodilator response value)

**Additional File – Table S2** – Characteristics of subjects with Lower Limit of Normal (LLN)-defined Preserved Ratio Impaired Spirometry (PRISm), control subjects, and obstructive spirometry in COPDGene

|                                                  | LLN controls     | LLN PRISm      | LLN COPD         |
|--------------------------------------------------|------------------|----------------|------------------|
| n                                                | 5095             | 1082           | 3315             |
| Age                                              | 57.6 (8.8)       | 58.1 (8.4)     | 62.9 (8.6) *     |
| Sex (% Male )                                    | 53.0             | 55.0           | 55.1             |
| African American                                 | 40.0*            | 31.7           | 22.9*            |
| Current smoker                                   | 57.9             | 61.0           | 41.4*            |
| Pack-years                                       | 38.2 (21.1)*     | 45.8 (26.4)    | 52.9 (27.3) *    |
| Body Mass Index                                  | 28.9 (5.8) *     | 32.1 (7.3)     | 27.9 (6.3) *     |
| FEV <sub>1</sub> % predicted                     | 95.5 (12.3) *    | 67.0 (8.2)     | 47.3 (17.0) *    |
| FVC % predicted                                  | 95.5 (12.5) *    | 69.5 (9.0)     | 75.1 (17.3) *    |
| FEV <sub>1</sub> /FVC                            | 0.78 (0.06) *    | 0.75 (0.06)    | 0.48 (0.13) *    |
| Bronchodilator Responsiveness <sup>†</sup>       | 10.7*            | 14.4           | 37.8*            |
| Total Lung Capacity % predicted                  | 92.0 (14.8) *    | 80.3 (13.7)    | 102.5 (17.1) *   |
| Segmental wall area percentage                   | 60.2 (2.9) *     | 62.5 (3.0)     | 63.1 (3.1) *     |
| Percent emphysema (% LAA-950 <sub>insp</sub> )   | 2.2 (2.8) *      | 1.8 (2.9)      | 13.9 (13.0) *    |
| Percent gas trapping (% LAA-856 <sub>exp</sub> ) | 11.7 (10.1)      | 12.0 (10.1)    | 41.0 (20.8) *    |
| Pi10                                             | 3.65 (0.11) *    | 3.72 (0.14)    | 3.73 (0.14)      |
| 6 minute walk distance (feet)                    | 1475.3 (357.8) * | 1274.3 (368.7) | 1157.2 (396.8) * |
| MMRC <sup>‡</sup> Dyspnea score                  | 0.8 (1.2) *      | 1.5 (1.5)      | 2.2 (1.4) *      |
| Resting O2 saturation                            | 97.0 (2.1) *     | 96.3 (2.4)     | 94.5 (3.7) *     |
| Chronic bronchitis                               | 12.7 *           | 19.7           | 29.3 *           |
| Short acting beta-agonist use                    | 13.1*            | 31.0           | 69.0*            |
| Long acting beta-agonist use                     | 5.2*             | 16.2           | 51.9*            |
| Inhaled corticosteroid use                       | 6.4*             | 19.3           | 54.2*            |
| Oral corticosteroid use                          | 0.5*             | 2.0            | 6.3*             |
| Congestive heart failure                         | 1.5*             | 5.5            | 5.4              |
| Coronary artery disease                          | 8.3*             | 16.5           | 16.1             |
| Diabetes mellitus                                | 12.0*            | 24.4           | 12.3*            |
| Hypertension                                     | 38.3*            | 49.0           | 49.4             |
| Hyperlipidemia                                   | 36.0*            | 45.8           | 40.2*            |
| History of blood clot                            | 3.2*             | 6.0            | 5.3              |
| Peripheral vascular disease                      | 1.4*             | 4.0            | 3.3              |
| History of stroke                                | 1.8*             | 3.8            | 3.4              |
| Gastrointestinal reflux disease                  | 21.2*            | 27.0           | 30.0             |
| History of compression fracture                  | 3.4*             | 5.9            | 6.5              |
| Currently employed                               | 36.3*            | 29.3           | 24.8*            |
| Physician-diagnosed asthma                       | 11.7*            | 21.0           | 25.3*            |

Data are presented as mean (standard deviation) or percent.

Preserved Ratio Impaired Spirometry (PRISm) defined as: FEV<sub>1</sub>/FVC≥0.7 & FEV<sub>1</sub><80% predicted

Control subjects defined as: FEV<sub>1</sub>/FVC≥0.7 & FEV<sub>1</sub>≥80% predicted

Chronic Obstructive Pulmonary Disease (COPD) subjects defined as: FEV<sub>1</sub>/FVC<0.7 & FEV<sub>1</sub><80% predicted

\* Denotes univariate p<0.05 when compared to LLN-PRISm subjects.

<sup>†</sup>Bronchodilator responsiveness considered present if the change in FEV<sub>1</sub> or FVC was >200mL and ≥ 12% predicted following administration of short acting inhaled beta-agonist.

<sup>‡</sup> MMRC = modified Medical Research Council

**Additional File – Table S3** – Significant predictors of *Preserved Ratio Impaired Spirometry (PRISm)* status relative to subjects with chronic obstructive pulmonary disease in (a) fixed threshold-defined and (b) lower limit of normal (LLN)-defined cohorts in multivariate models

| Panel (a) – Significant predictors in fixed threshold- defined cohorts |                     | Panel (b) – Significant predictors in LLN defined cohorts |                     |
|------------------------------------------------------------------------|---------------------|-----------------------------------------------------------|---------------------|
| Predictor                                                              | OR [95% CI]         | Predictor                                                 | OR [95% CI]         |
| Body mass index                                                        | 1.046 [1.028-1.063] | Body mass index                                           | 1.059 [1.040-1.079] |
| Resting oxygen saturation                                              | 1.096 [1.049-1.145] | Resting oxygen saturation                                 | 1.139 [1.086-1.195] |
| MMRC Dyspnea score                                                     | 0.893 [0.825-0.967] | MMRC Dyspnea score                                        | 0.809 [0.745-0.877] |
| Percent gas trapping                                                   | 0.938 [0.926-0.951] | Percent gas trapping                                      | 0.948 [0.936-0.960] |
| Percent emphysema                                                      | 0.883 [0.841-0.927] | Percent emphysema                                         | 0.885 [0.848-0.924] |
| Total lung capacity % predicted                                        | 0.946 [0.938-0.954] | Total lung capacity % predicted                           | 0.945 [0.937-0.953] |
| Segmental wall area percent                                            | 0.865 [0.832-0.898] | Segmental wall area percent                               | 0.853 [0.821-0.887] |
| Bronchodilator responsive                                              | 0.352 [0.272-0.456] | Bronchodilator responsive                                 | 0.342 [0.261-0.447] |
| Diabetes Mellitus                                                      | 1.459 [1.103-1.931] | Diabetes Mellitus                                         | 1.971 [1.473-2.637] |
| Age                                                                    | 0.963 [0.950-0.976] | African American race                                     | 0.691 [0.527-0.905] |
| Sex (male)                                                             | 0.506 [0.405-0.633] |                                                           |                     |
| Chronic bronchitis                                                     | 0.762 [0.587-0.989] |                                                           |                     |

Variables tested but not retained in the final models:

Panel (a): African American race, current smoking, pack-years smoked, Pi10, six minute walk distance, coronary artery disease, gastro-esophageal reflux disease, physician-diagnosed asthma, and current employment.

Panel (b): age, current smoking, pack-years smoked, six minute walk distance, chronic bronchitis, hyperlipidemia, physician-diagnosed asthma, and current employment.

No significant confounders (defined as causing >10% change in effect estimate) were found.

**Additional File – Table S4** - Top 10 results of GWAS meta-analysis of fixed threshold-defined Preserved Ratio Impaired Spirometry (PRISm) subjects versus control subjects

| Marker      | Chromosome | Nearest Gene    | p-value  |
|-------------|------------|-----------------|----------|
| rs113840005 | 12         | <i>PLEKHA5</i>  | 1.80E-07 |
| rs7722385   | 5          | <i>MYO10</i>    | 2.22E-07 |
| rs112374690 | 8          | <i>PVT1</i>     | 2.54E-07 |
| rs12246467  | 10         | <i>CACNB2</i>   | 3.11E-07 |
| rs77442831  | 10         | <i>CACNB2</i>   | 3.72E-07 |
| rs12252650  | 10         | <i>CACNB2</i>   | 5.22E-07 |
| rs9663417   | 10         | <i>CACNB2</i>   | 5.24E-07 |
| rs7722821   | 5          | <i>MYO10</i>    | 6.34E-07 |
| rs73333595  | 12         | <i>PLEKHA5</i>  | 6.60E-07 |
| rs4731411   | 7          | <i>MIR129-1</i> | 7.35E-07 |

Individual genome-wide association analyses, adjusting for age, sex, pack-years, body mass index, current smoking status, and principal components for genetic ancestry, were conducted separately in non-Hispanic white (n = 698 cases / 2534 controls) and African American (n = 518 cases / 1749 controls) subjects. Meta-analysis was performed using standard error weighting.



**Additional File – Table S5** – Top 10 results of GWAS meta-analysis of lower limit of normal defined Preserved Ratio Impaired Spirometry (LLN-PRISm) subjects versus control subjects

| Marker      | Chromosome | Nearest Gene   | p-value  |
|-------------|------------|----------------|----------|
| rs114686219 | 3          | <i>ZCWPW2</i>  | 4.32E-07 |
| rs183231082 | 10         | <i>FAM13C</i>  | 4.77E-07 |
| rs113840005 | 12         | <i>PLEKHA5</i> | 8.82E-07 |
| rs139923689 | 11         | <i>CNTN5</i>   | 9.18E-07 |
| rs181659752 | 3          | <i>ZIC4</i>    | 9.27E-07 |
| rs140202167 | 8          | <i>DECRI</i>   | 9.33E-07 |
| rs183026977 | 10         | <i>SFTA1P</i>  | 9.35E-07 |
| rs6140864   | 20         | <i>PLCB4</i>   | 9.63E-07 |
| rs1568903   | 4          |                | 1.17E-06 |
| rs13121426  | 4          |                | 1.39E-06 |

Individual genome-wide association analyses, adjusting for age, sex, pack-years, body mass index, current smoking status, and principal components for genetic ancestry, were conducted separately in non-Hispanic white (n = 723 cases / 3006 controls) and African American (n = 330 cases / 1968 controls) subjects. Meta-analysis was performed using standard error weighting.

**Additional File – Table S6** – 10<sup>th</sup> and 90<sup>th</sup> percentile values of selected variables in subjects with *Preserved Ratio Impaired Spirometry (PRISm)* as defined by (a) fixed threshold and (b) lower limit of normal (LLN) criteria

| GOLD - PRISm | Variable                                        | LLN - PRISm |
|--------------|-------------------------------------------------|-------------|
| 22.9 – 41.8  | BMI                                             | 23.3 – 42.3 |
| 58.5 – 78.7  | FEV <sub>1</sub> (% predicted)                  | 55.7 – 75.9 |
| 0.1 – 3.5    | Emphysema (%)                                   | 0.1 – 4.4   |
| 62.5 – 97.2  | Total lung capacity <sub>CT</sub> (% predicted) | 62.9 – 97.8 |

**Additional File – Table S7**– Normalized mutual information and silhouette widths derived from five-fold cross validation analysis in (a) non-Hispanic white (n = 655) and (b) African American (n = 480) subjects with fixed threshold-defined Preserved Ratio Impaired Spirometry (PRISm)

(a) Results for non-Hispanic white fixed-threshold PRISm subjects

| k = | Normalized Mutual Information |        | Silhouette Width |        |
|-----|-------------------------------|--------|------------------|--------|
|     | mean                          | SD     | mean             | SD     |
| 2   | 0.7297                        | 0.0953 | 0.1905           | 0.0207 |
| 3   | 0.8143                        | 0.1072 | 0.1591           | 0.0109 |
| 4   | 0.8992                        | 0.0624 | 0.1531           | 0.0124 |
| 5   | 0.7591                        | 0.1289 | 0.1232           | 0.0062 |
| 6   | 0.6676                        | 0.0904 | 0.1219           | 0.0119 |
| 7   | 0.6860                        | 0.0735 | 0.1219           | 0.0155 |

(b) Results for African American fixed-threshold PRISm subjects

| k | Normalized Mutual Information |        | Silhouette Width |        |
|---|-------------------------------|--------|------------------|--------|
|   | mean                          | SD     | mean             | SD     |
| 2 | 0.7551                        | 0.0982 | 0.1586           | 0.0184 |
| 3 | 0.8827                        | 0.0431 | 0.1699           | 0.0124 |
| 4 | 0.7165                        | 0.1200 | 0.1494           | 0.0208 |
| 5 | 0.8290                        | 0.1250 | 0.1512           | 0.0216 |
| 6 | 0.7558                        | 0.0870 | 0.1369           | 0.0101 |
| 7 | 0.6967                        | 0.0782 | 0.119            | 0.0141 |

**Additional File – Table S8** – Normalized mutual information and silhouette widths derived from five-fold cross validation in (a) non-Hispanic white (n = 681) and (b) African American (n = 297) subjects with lower limit of normal-defined Preserved Ratio Impaired Spirometry (PRISm).

(a) Results for non-Hispanic white LLN-PRISm subjects

| k = | Normalized Mutual Information |        | Silhouette Width |        |
|-----|-------------------------------|--------|------------------|--------|
|     | mean                          | SD     | mean             | SD     |
| 2   | 0.8164                        | 0.1912 | 0.1666           | 0.0083 |
| 3   | 0.8728                        | 0.1367 | 0.1633           | 0.0093 |
| 4   | 0.8792                        | 0.0300 | 0.1357           | 0.0052 |
| 5   | 0.6311                        | 0.0975 | 0.1234           | 0.0062 |
| 6   | 0.6238                        | 0.1502 | 0.1090           | 0.0137 |
| 7   | 0.6609                        | 0.0670 | 0.1250           | 0.0099 |

(b) Results for African American LLN-PRISm subjects

| k | Normalized Mutual Information |        | Silhouette Width |        |
|---|-------------------------------|--------|------------------|--------|
|   | mean                          | SD     | mean             | SD     |
| 2 | 0.6547                        | 0.2810 | 0.1370           | 0.0409 |
| 3 | 0.6119                        | 0.1646 | 0.1183           | 0.0422 |
| 4 | 0.9169                        | 0.0982 | 0.1435           | 0.0349 |
| 5 | 0.8312                        | 0.1433 | 0.1335           | 0.0372 |
| 6 | 0.7622                        | 0.0664 | 0.1067           | 0.0330 |
| 7 | 0.6502                        | 0.0589 | 0.0934           | 0.0223 |

**Additional File – Table S9.** Results of unsupervised k-means clustering of (a) non-Hispanic white and (b) African American subjects with *Preserved Ratio Impaired Spirometry* by lower limits of normal criteria.

| Feature                              | (a) Non-Hispanic White subjects |                |                |                | (b) African American subjects |                |                |                |
|--------------------------------------|---------------------------------|----------------|----------------|----------------|-------------------------------|----------------|----------------|----------------|
|                                      | Cluster 1                       | Cluster 2      | Cluster 3      | Cluster 4      | Cluster 1                     | Cluster 2      | Cluster 3      | Cluster 4      |
| n                                    | 163                             | 171            | 157            | 190            | 75                            | 61             | 72             | 89             |
| Age                                  | 56.8 (8.5)                      | 65.0 (7.5)     | 61.7 (8.8)     | 58.2 (7.6)     | 52.5 (4.8)                    | 56.4 (6.6)     | 51.4 (4.4)     | 53.3 (5.0)     |
| Sex (% male)                         | 47.2                            | 67.8           | 61.2           | 44.7           | 60.0                          | 70.5           | 34.7           | 59.6           |
| Body Mass Index                      | 33.6 (6.9)                      | 30.3 (6.3)     | 35.5 (6.8)     | 28.6 (5.3)     | 30.6 (5.9)                    | 27.7 (5.2)     | 42.3 (6.0)     | 29.4 (5.5)     |
| Current smoker                       | 52.2                            | 32.8           | 41.4           | 70.5           | 85.3                          | 82.0           | 76.4           | 87.6           |
| Pack-years                           | 44.0 (25.3)                     | 53.7 (35.0)    | 52.9 (29.6)    | 47.1 (20.1)    | 34.3 (19.9)                   | 42.5 (22.1)    | 35.8 (18.0)    | 39.7 (20.1)    |
| FEV <sub>1</sub> % predicted         | 71.9 (5.1)                      | 68.7 (6.6)     | 59.0 (8.1)     | 71.8 (4.7)     | 69.2 (5.2)                    | 66.1 (6.8)     | 66.3 (5.8)     | 60.7 (8.7)     |
| FEV <sub>1</sub> /FVC                | 0.80 (0.04)                     | 0.70 (0.04)    | 0.72 (0.04)    | 0.73 (0.03)    | 0.83 (0.04)                   | 0.73 (0.04)    | 0.77 (0.04)    | 0.74 (0.04)    |
| FEF <sub>25-75</sub>                 | 2.30 (0.65)                     | 1.35 (0.50)    | 1.21 (0.38)    | 1.59 (0.47)    | 2.44 (0.75)                   | 1.54 (0.52)    | 1.56 (0.49)    | 1.37 (0.40)    |
| Resting O <sub>2</sub> saturation    | 96.2 (2.3)                      | 96.1 (2.0)     | 95.2(2.8)      | 96.5 (2.0)     | 97.4 (1.6)                    | 96.8 (2.6)     | 96.4 (2.2)     | 96.8 (2.9)     |
| TLC <sub>CT</sub> % predicted        | 76.5 (9.1)                      | 88.8 (11.1)    | 74.8 (11.5)    | 91.9 (9.7)     | 67.0 (10.3)                   | 80.4 (11.0)    | 81.6 (11.7)    | 67.3 (11.1)    |
| Percent emphysema                    | 0.9 (1.0)                       | 5.2 (3.8)      | 1.1 (1.3)      | 0.7 (0.5)      | 0.4 (0.4)                     | 4.2 (5.5)      | 1.2 (1.2)      | 0.5 (0.5)      |
| Segmental Wall Area %                | 62.0 (2.4)                      | 60.7 (2.4)     | 64.7 (2.6)     | 61.7 (2.5)     | 61.7 (2.5)                    | 60.5 (3.1)     | 64.6 (2.4)     | 65.5 (2.6)     |
| Percent Gas Trapping                 | 7.1 (6.0)                       | 21.4 (10.1)    | 12.1 (8.9)     | 9.9 (8.3)      | 6.7 (7.7)                     | 19.4 (13.8)    | 11.3 (8.4)     | 7.9 (6.4)      |
| Diabetes Mellitus                    | 26.4                            | 18.7           | 38.9           | 13.2           | 24.0                          | 23.0           | 37.5           | 18.0           |
| Hypertension                         | 41.7                            | 52.6           | 59.2           | 36.8           | 46.7                          | 54.1           | 61.1           | 48.3           |
| Hyperlipidemia                       | 47.2                            | 57.9           | 58.6           | 50.5           | 37.3                          | 32.8           | 34.7           | 23.6           |
| Chronic bronchitis                   | 20.3                            | 15.2           | 29.3           | 22.6           | 9.3                           | 18.0           | 15.3           | 16.9           |
| Bronchodilator Response <sup>†</sup> | 11.7                            | 13.5           | 18.7           | 14.9           | 12.2                          | 6.8            | 15.3           | 20.9           |
| MMRC <sup>‡</sup>                    | 1.20 (1.38)                     | 1.18 (1.32)    | 1.99 (1.41)    | 1.17 (1.35)    | 1.44 (1.56)                   | 1.49 (1.44)    | 2.39 (1.49)    | 1.56 (1.54)    |
| 6 minute walk distance               | 1380.8 (358.6)                  | 1381.2 (336.4) | 1116.9 (390.3) | 1395.5 (310.2) | 1298.8 (338.4)                | 1282.7 (291.3) | 1030.5 (353.4) | 1206.1 (339.4) |

**Additional File – Table S10** – Candidate gene testing in fixed-threshold Preserved Ratio Impaired Spirometry (PRISm) subgroups.

| SNP        | Closest Gene           | Disease Association in Literature | ANOVA p-value in NHW | ANOVA p-value in AA |
|------------|------------------------|-----------------------------------|----------------------|---------------------|
| rs10811661 | <i>CDKN2B</i>          | Diabetes                          | NS                   | NS                  |
| rs2237892  | <i>KCNQ1</i>           | Diabetes                          | NS                   | NS                  |
| rs2283228  | <i>KCNQ1</i>           | Diabetes                          | NS                   | NS                  |
| rs4402960  | <i>IGF2BP2</i>         | Obesity, diabetes                 | NS                   | NS                  |
| rs8050136  | <i>FTO</i>             | Obesity, diabetes                 | NS                   | 0.05                |
| rs9939609  | <i>FTO</i>             | Obesity                           | NS                   | NS                  |
| rs10146997 | <i>NRXN3</i>           | Central obesity, substance abuse  | NS                   | NS                  |
| rs10198628 | <i>TRIB2</i>           | Pericardial fat volume            | NS                   | NS                  |
| rs161976   | <i>BICD1</i>           | COPD/emphysema                    | NS                   | NS                  |
| rs10844154 | <i>BICD1</i>           | COPD/emphysema                    | NS                   | NS                  |
| rs13180    | <i>IREB2</i>           | COPD                              | NS                   | NS                  |
| rs8034191  | <i>AGPHD; CHRNA3/5</i> | COPD                              | NS                   | NS                  |
| rs1051730  | <i>CHRNA3</i>          | COPD                              | NS                   | NS                  |
| rs12504628 | <i>HHIP</i>            | COPD                              | NS                   | NS                  |
| rs1980057  | <i>HHIP</i>            | COPD                              | NS                   | 0.02                |
| rs7671167  | <i>FAM13A</i>          | COPD                              | NS                   | NS                  |
| rs2609255  | <i>FAM13A</i>          | ILD/IPF                           | NS                   | NS                  |
| rs2736100  | <i>TERT</i>            | ILD/IPF                           | NS                   | NS                  |
| rs868903   | <i>MUC5B</i>           | ILD/IPF                           | NS                   | NS                  |
| rs35705950 | <i>MUC5B</i>           | ILD/IPF                           | NS                   | NS                  |
| rs2070600  | <i>AGER</i>            | Lung function                     | NS                   | NS                  |

NS = "Not significant"

## Additional Figures

**Additional File - Figure S1.** Distribution of spirometry in COPDGene by lower limit of normal criteria.

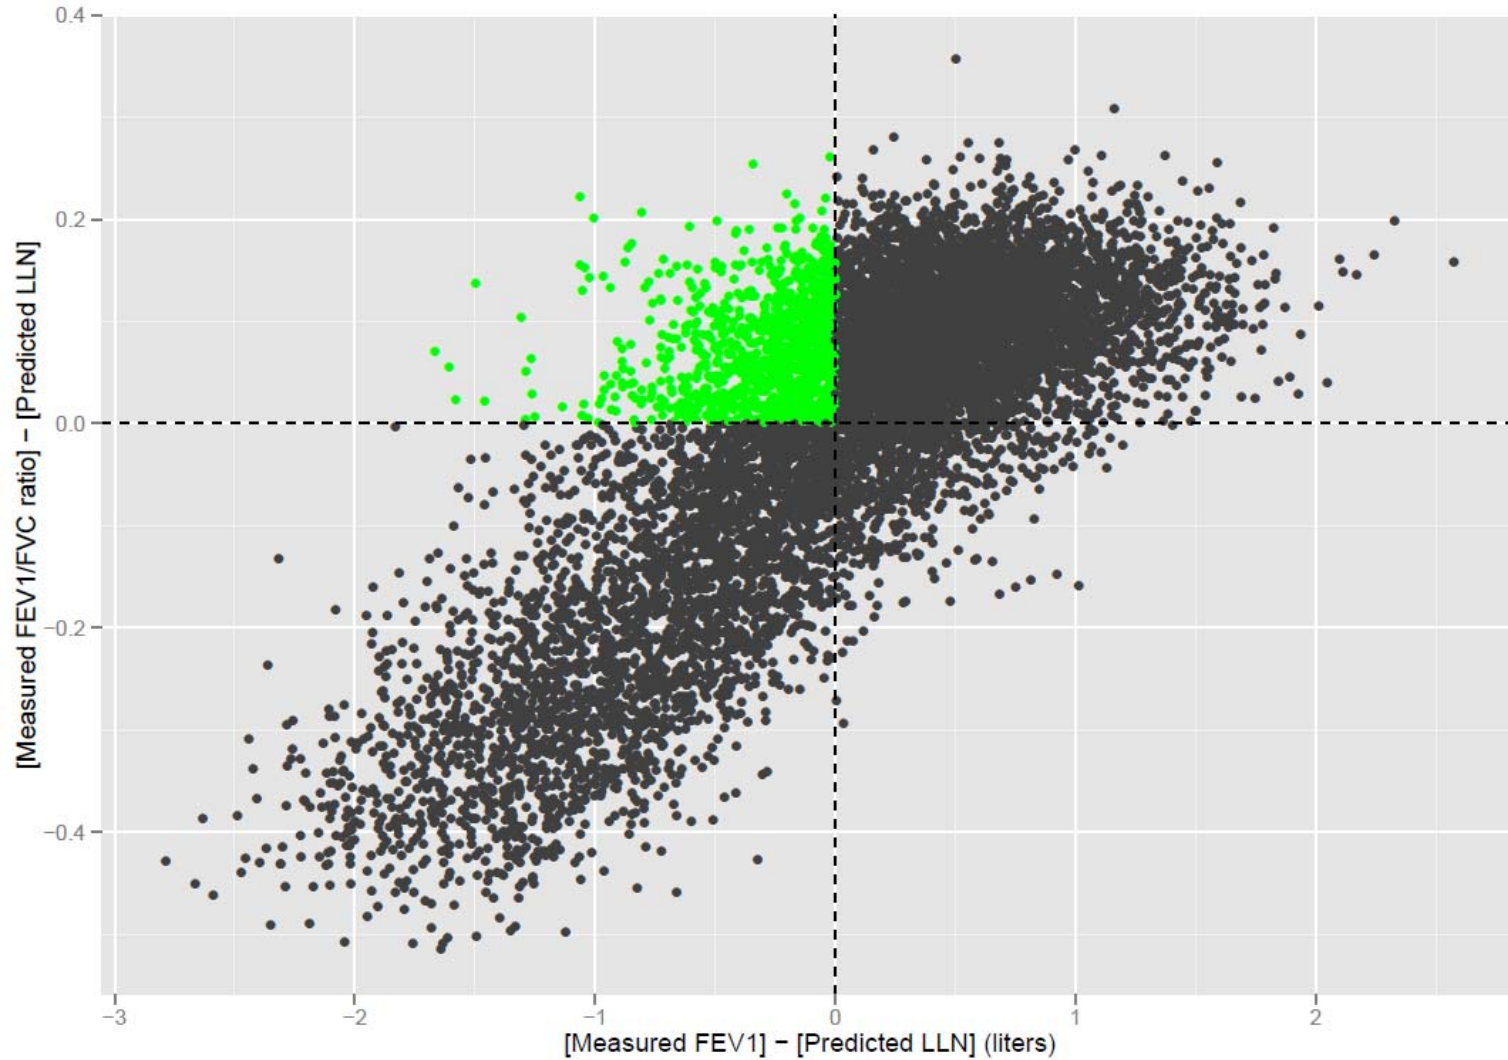

The difference between measured FEV<sub>1</sub> and the LLN-predicted FEV<sub>1</sub> is plotted on the x-axis while the difference between measured FEV<sub>1</sub>/FVC ratio and the LLN-predicted ratio is plotted on the y-axis. Dashed lines indicate where the difference between measured values and LLN = 0 (i.e. LLN) and delineate subjects with LLN – PRISM (highlighted in green) in the upper left quadrant, LLN-controls (upper right quadrant), and LLN-COPD (lower left quadrant).

**Additional File - Figure S2**– Overlap between fixed threshold-defined (red oval,  $n_{\text{total}} = 1,257$ ) and lower limit of normal (LLN)-defined (blue oval,  $n_{\text{total}} = 1,082$ ) Preserved Ratio Impaired Spirometry (PRISm) cohorts in COPDGene.

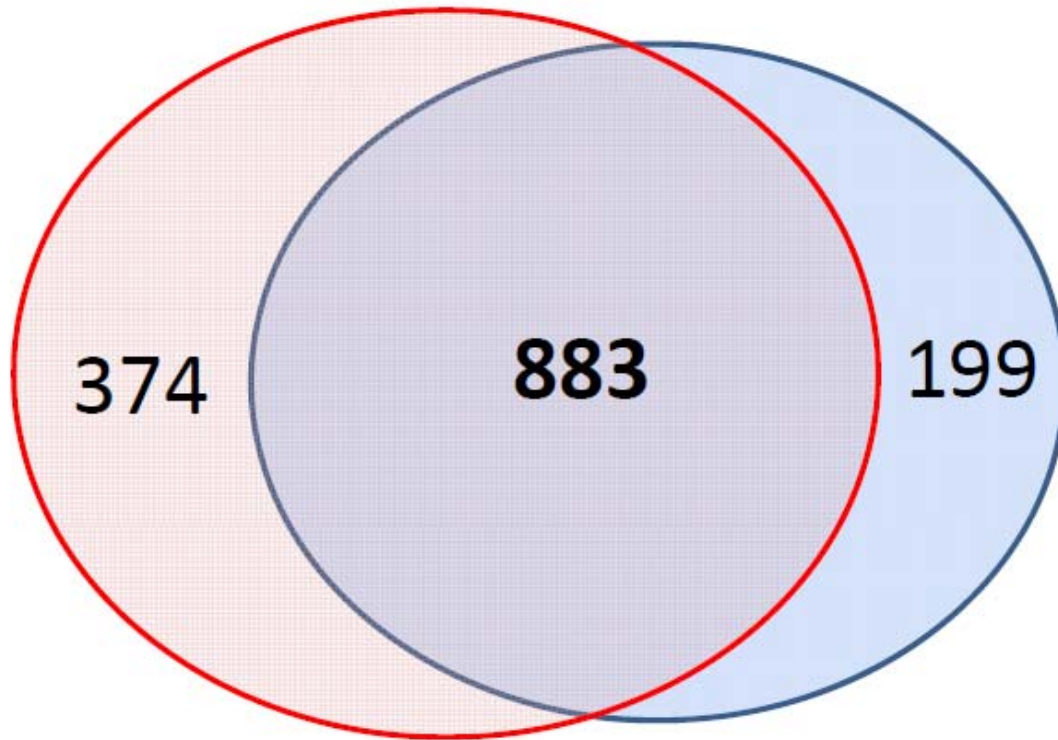



**Additional File - Figure S3.** Reclassification of PRISm subjects by application of (a) lower limit of normal (LLN) or (b) fixed threshold criteria.

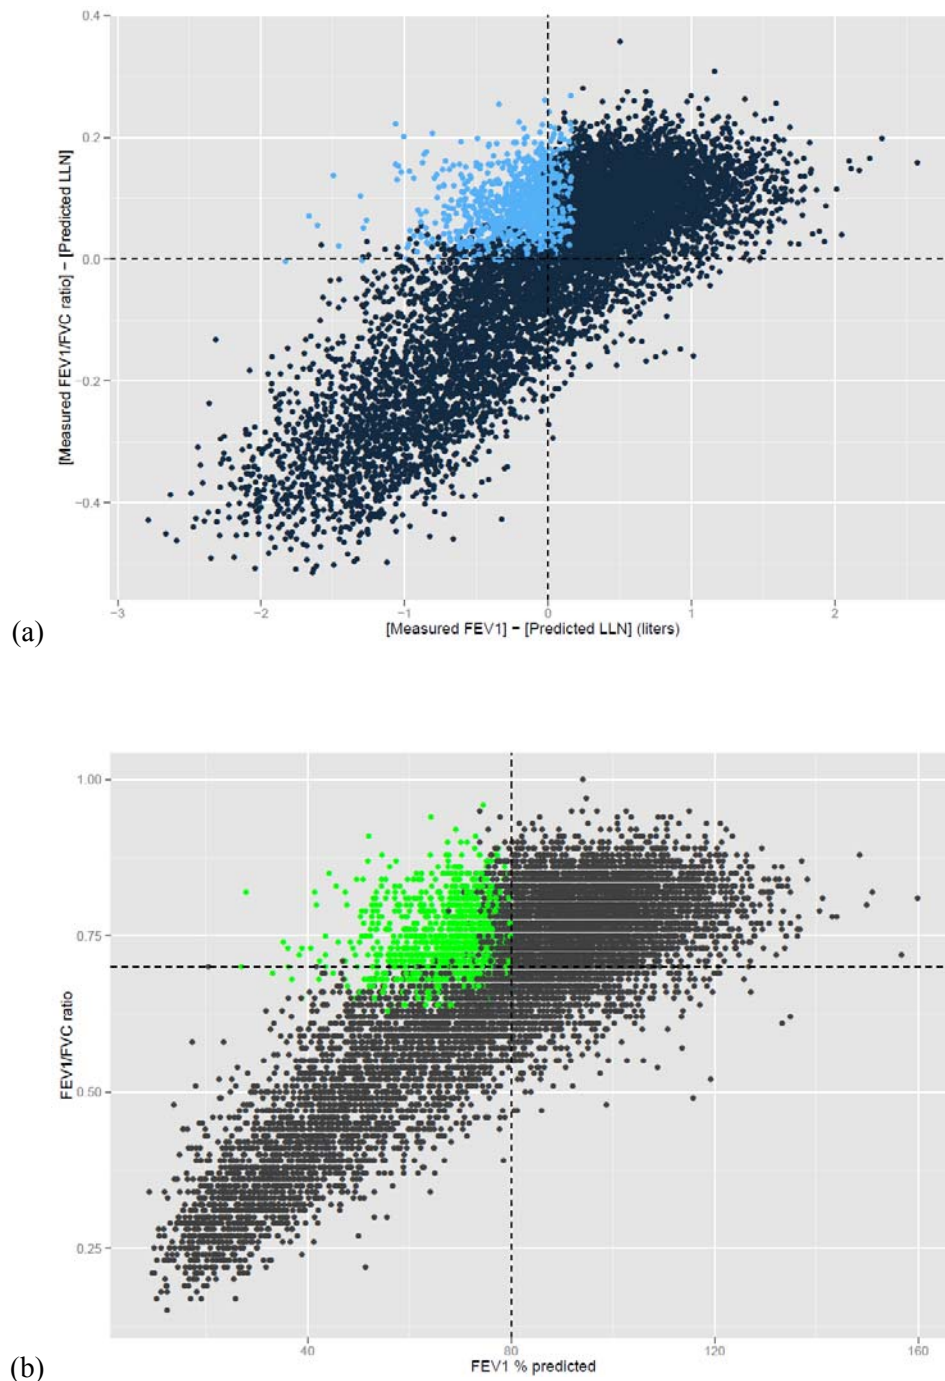

For both panels, dashed lines represent the thresholds used to define PRISm (upper left quadrant), COPD (lower left quadrant), and control subjects (upper right quadrant). In panel (a) subjects with *fixed threshold defined* PRISm are plotted (in blue) against LLN-delineated thresholds. A large number of fixed threshold PRISm subjects are thus seen to be classified as control subjects by LLN thresholds. In panel (b) *LLN-defined* PRISm subjects (in green) are plotted against fixed-threshold criteria – a large number of LLN-PRISm subjects are classified as COPD subjects using fixed-threshold criteria.

**Additional File - Figure S4** – Plot of mean single nucleotide polymorphism (SNP) intensities located on the X (x-axis) and Y (y-axis) chromosomes. Each point represents one subject; color of point represents self-reported gender (blue = male, pink = female). Six Klinefelter syndrome (47XXY) subjects were putatively identified (red oval).

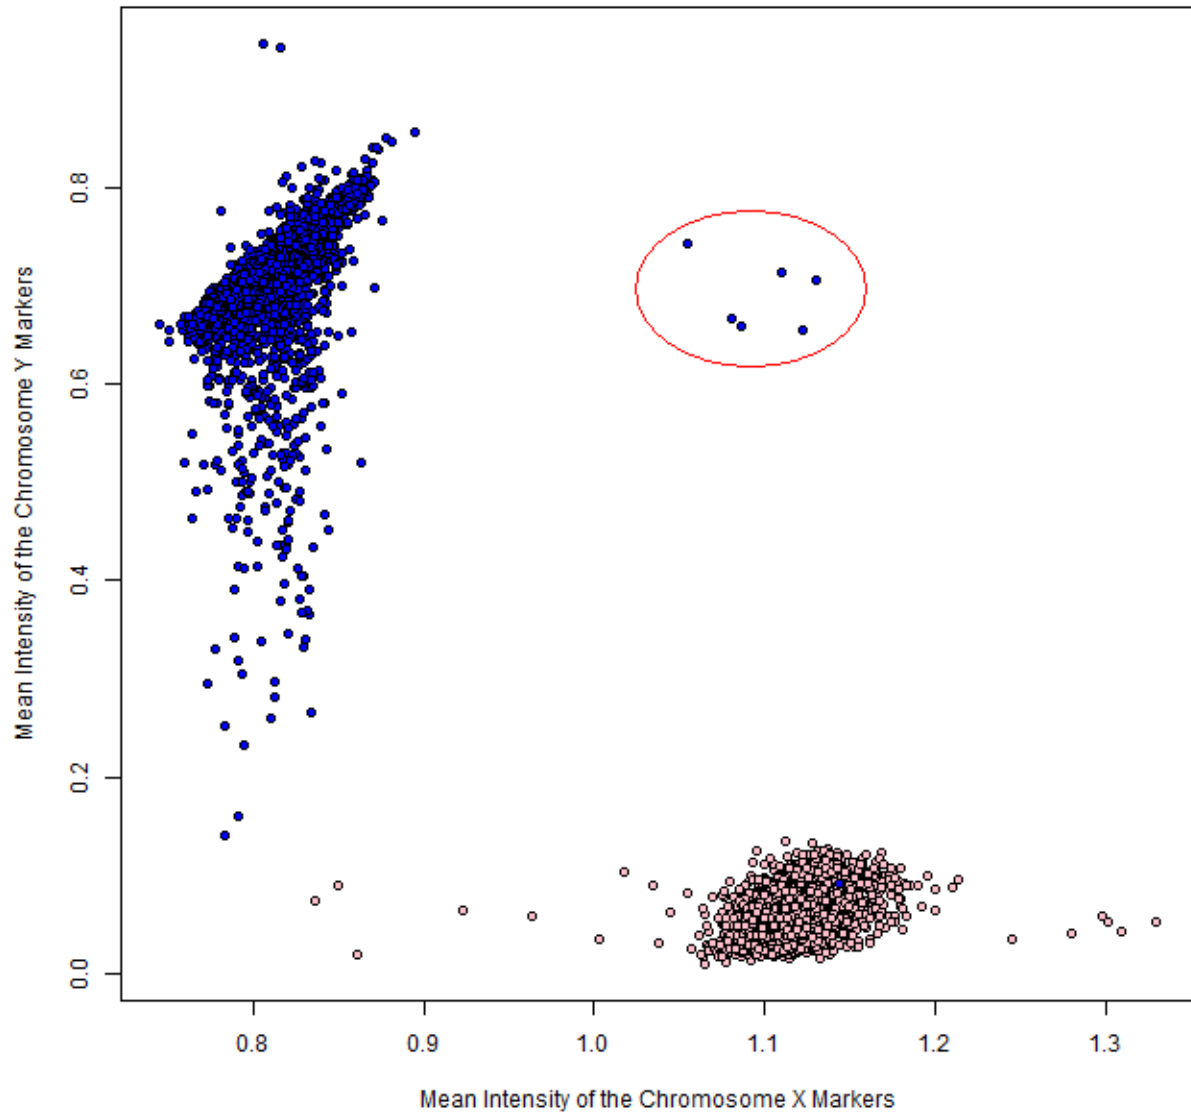

**Additional File - Figure S5** - (a) Quantile-quantile plot of expected (x-axis) and actual (y-axis) p-values and (b) Manhattan plot of actual p-values (y-axis) by chromosomal location (x-axis) for meta-analysis of fixed threshold-defined Preserved Ratio Impaired Spirometry (PRISm) subjects versus control subjects genome-wide association study.

**(a)**

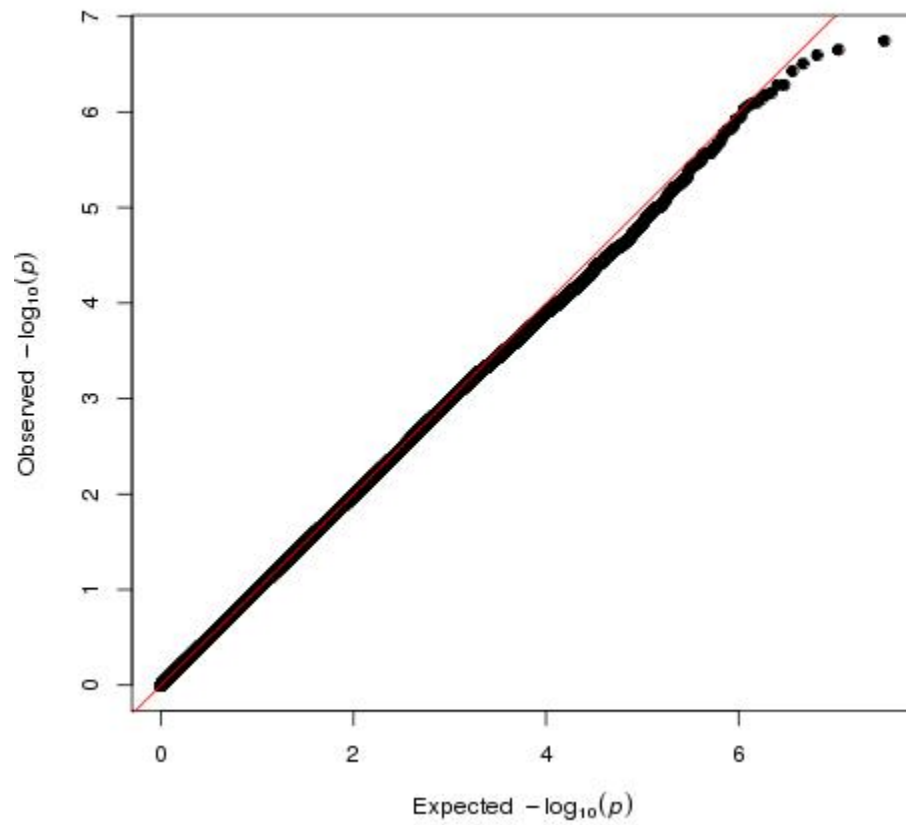

(b)

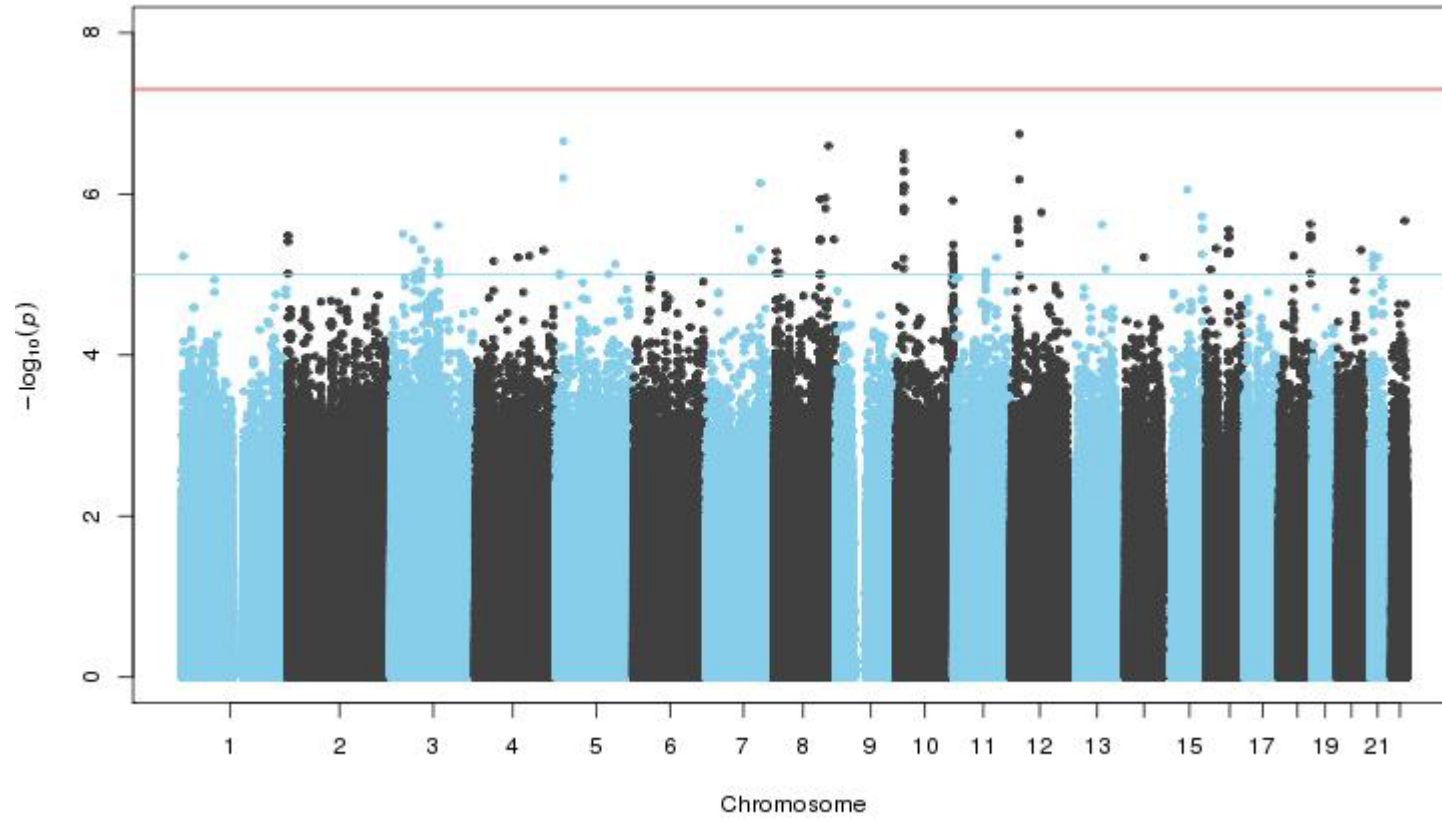

**Additional File - Figure S6.** Clustering results of NHW (solid lines) and AA (hatched lines) subjects with fixed-threshold defined *Preserved Ratio Impaired Spirometry*.

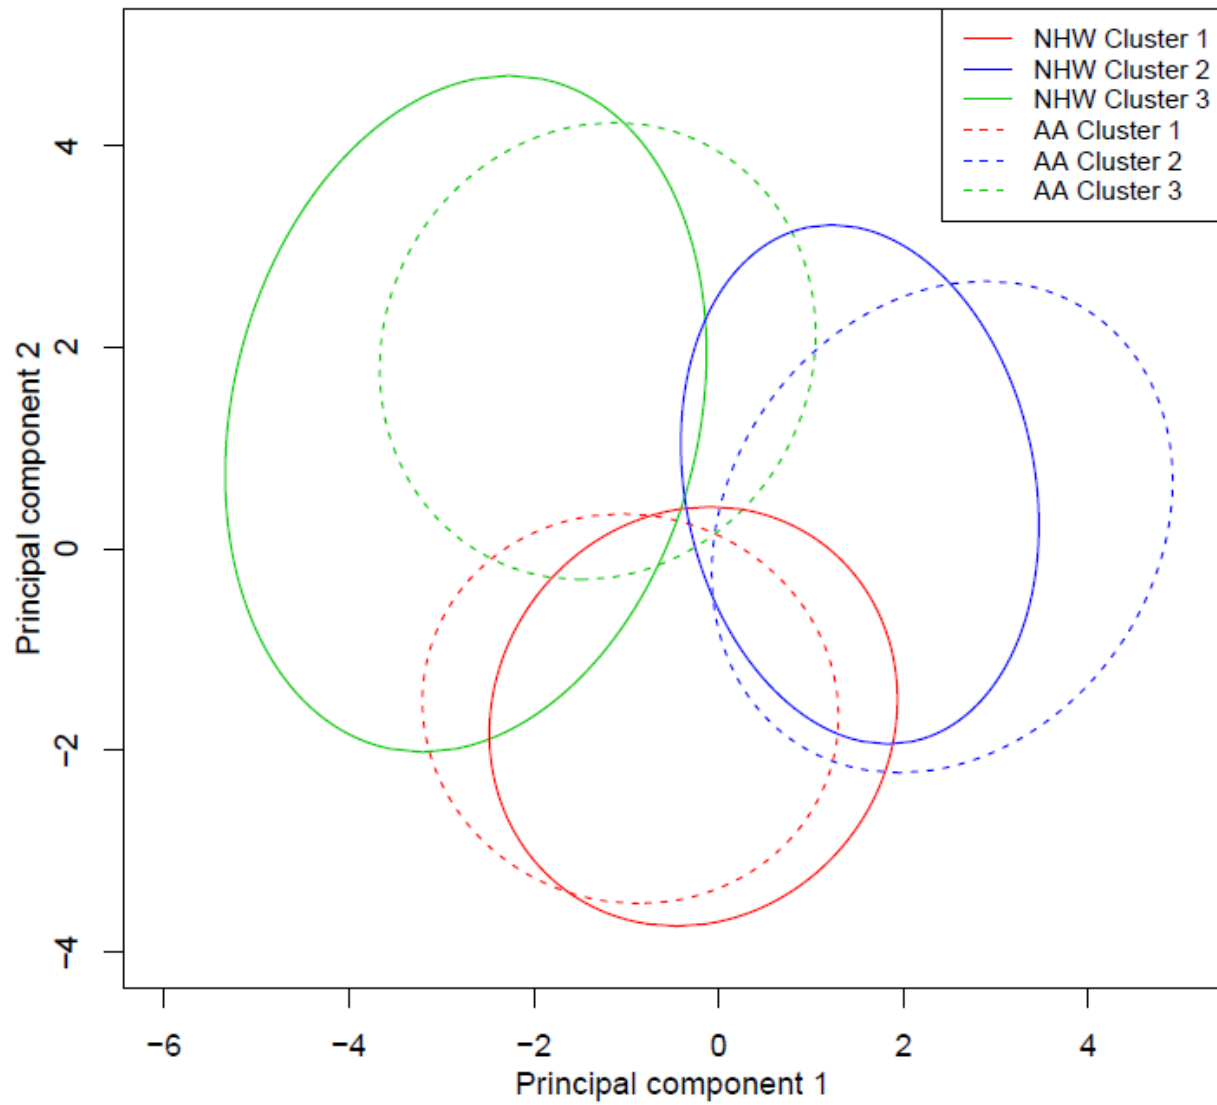

**Additional File - Figure S7.** Results of unsupervised k-means clustering in (a) non-Hispanic white and (b) African American subjects with lower limit of normal defined Preserved Ratio Impaired Spirometry.

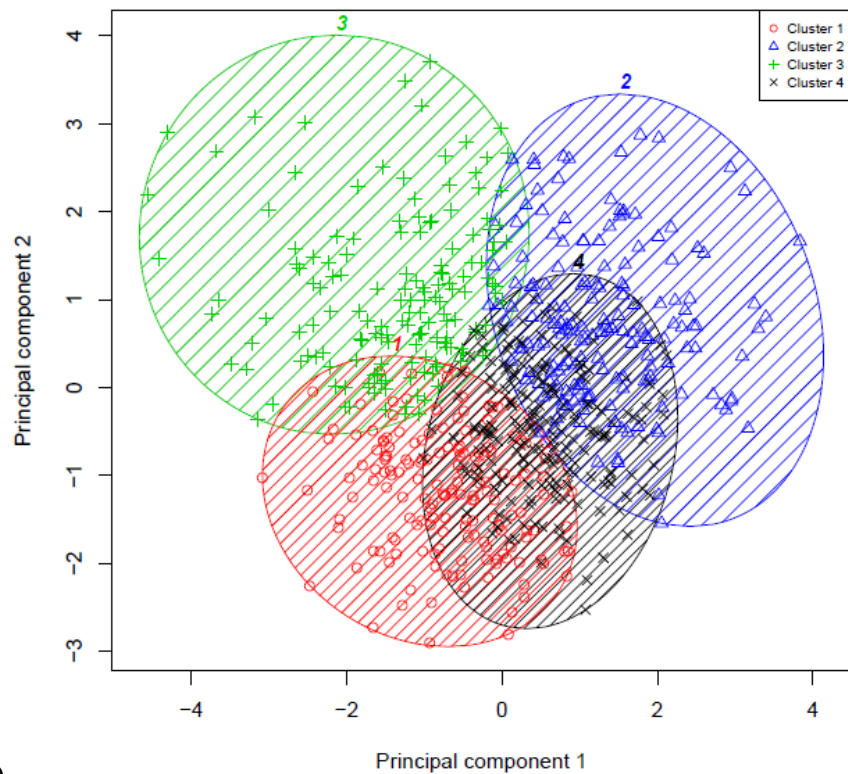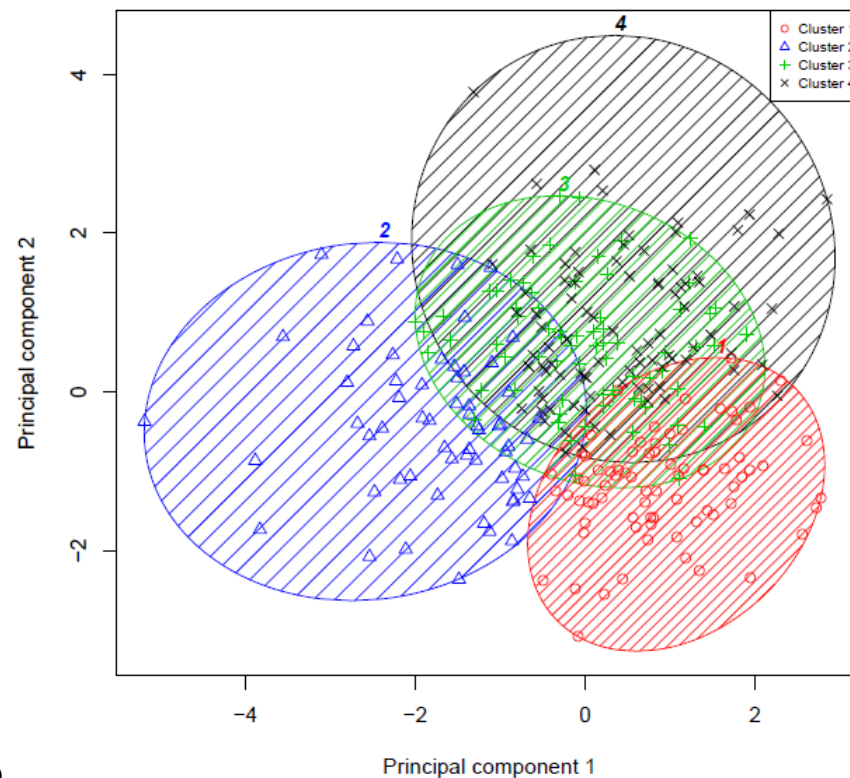

**Additional File – Figure S8.** Clustering results of NHW (solid lines) and AA (hatched lines) subjects with lower limit of normal- defined *Preserved Ratio Impaired Spirometry*.

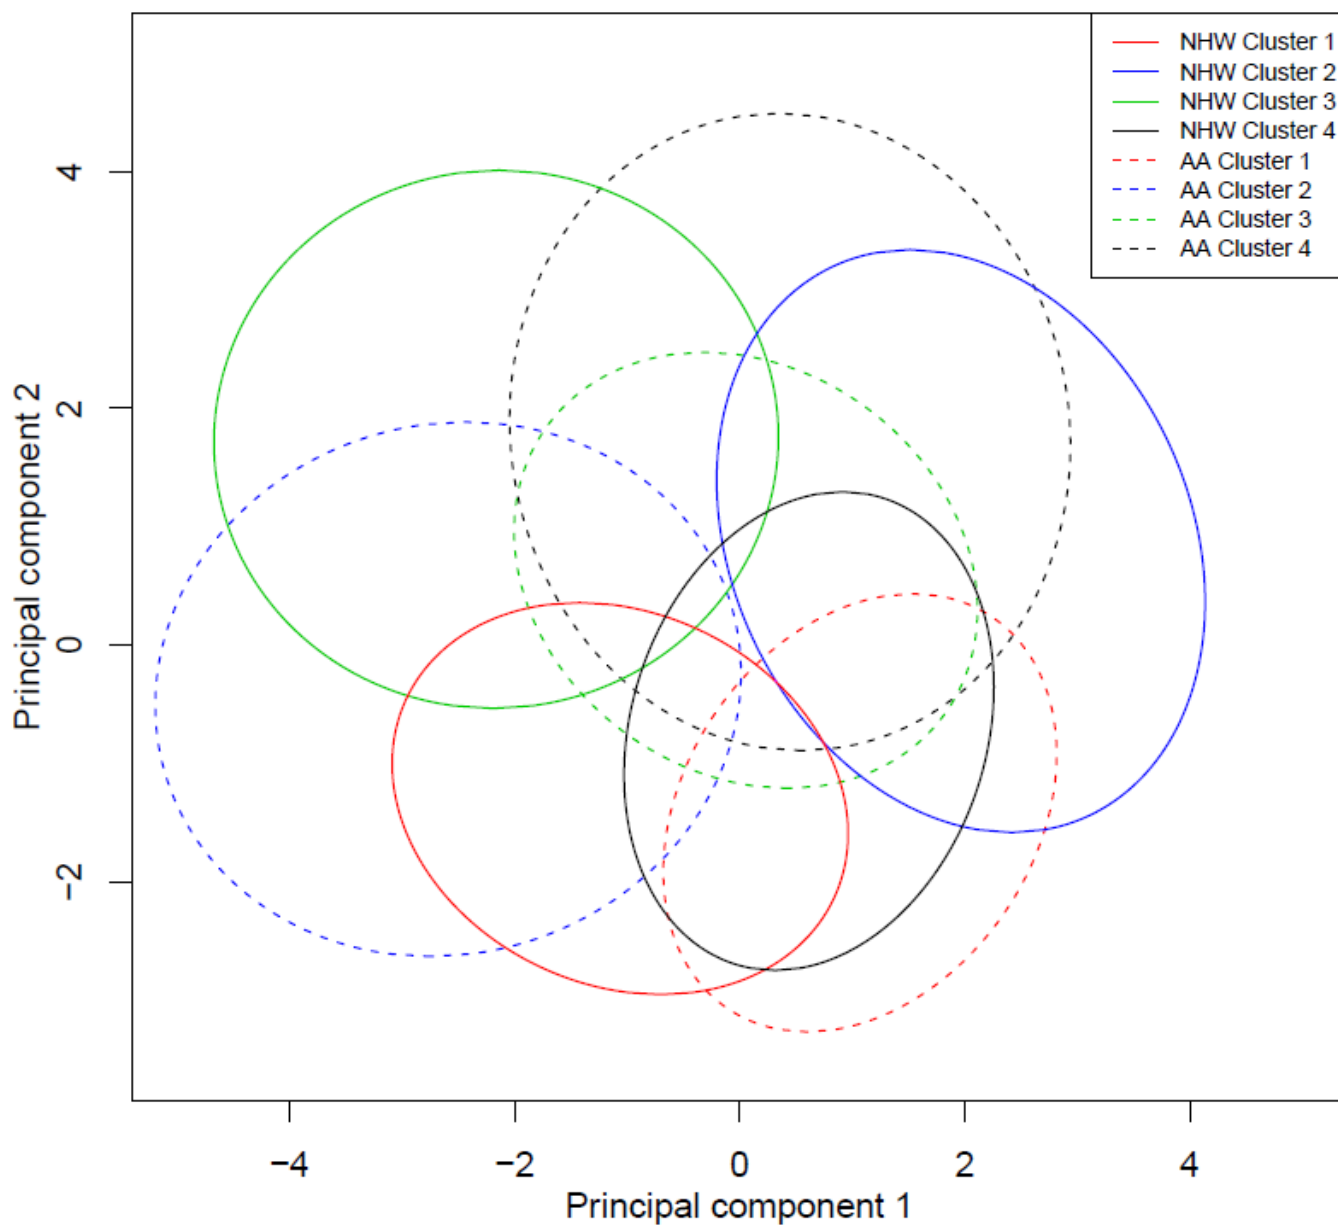

**Additional File - Figure S9** – Minor (risk) allele frequency of rs8050136 (*FTO*) by race and cluster in fixed threshold-defined Preserved Ratio Impaired Spirometry (PRISm) subjects.

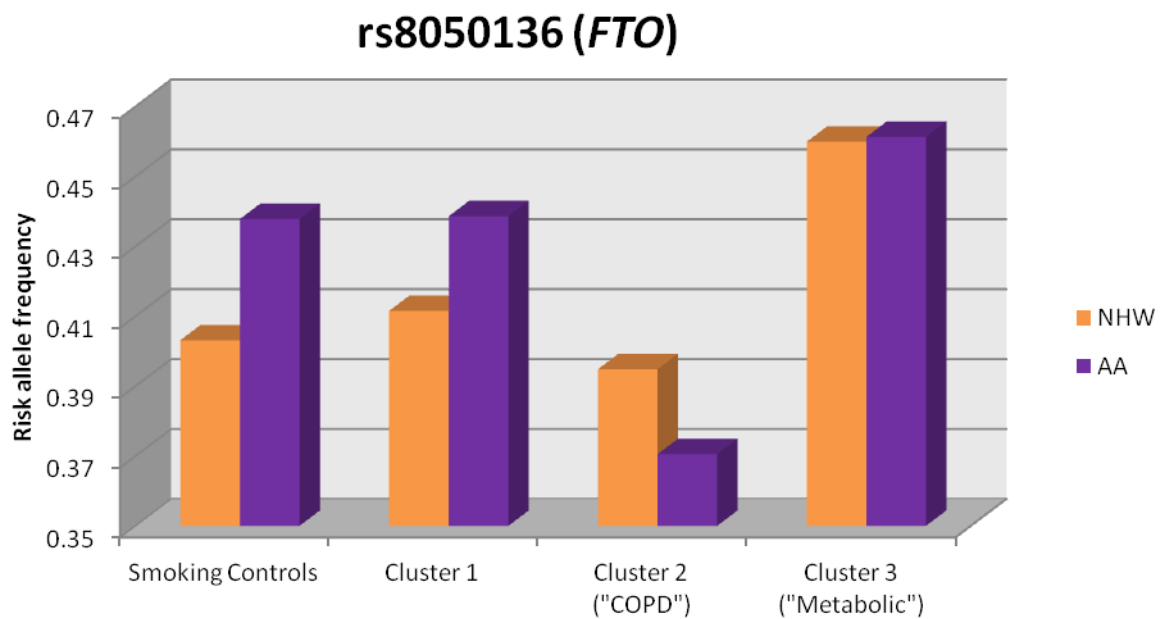

NHW = non-Hispanic white, AA = African American



**Additional File - Figure S10**— Prevalence of overweight and obesity in the United States[8] from 1960-2010 relative to the prevalence of *Preserved Ratio Impaired Spirometry (PRISm)*[9-19].

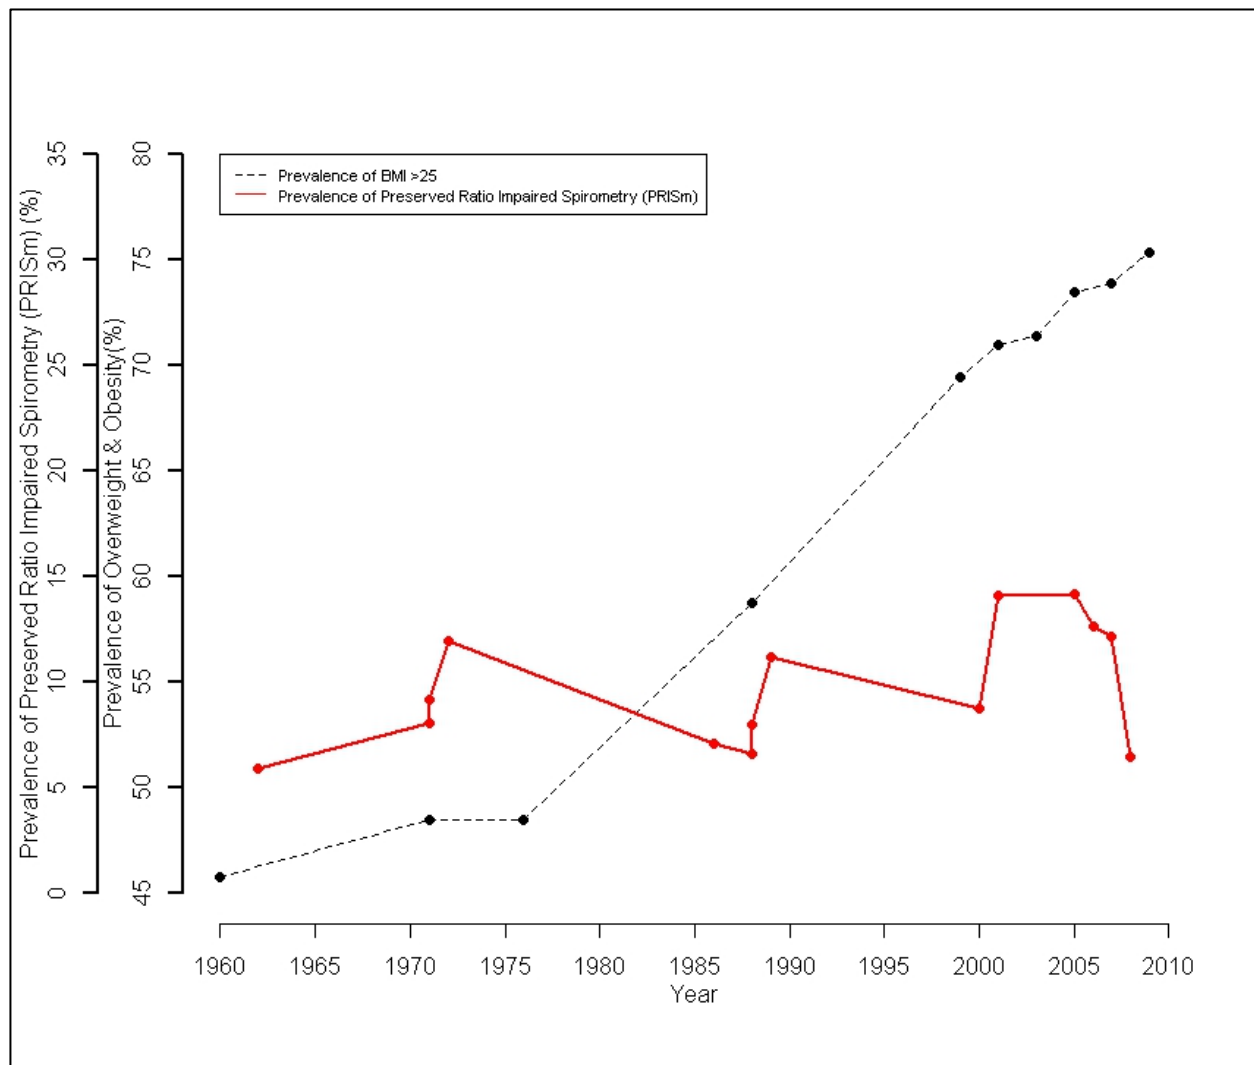

## Additional Files – References

1. Pellegrino R, Viegi G, Brusasco V, Crapo RO, Burgos F, Casaburi R, Coates A, van der Grinten CP, Gustafsson P, Hankinson J *et al*: **Interpretative strategies for lung function tests**. *Eur Respir J* 2005, **26**(5):948-968.
2. Stocks J, Quanjer PH: **Reference values for residual volume, functional residual capacity and total lung capacity**. **ATS Workshop on Lung Volume Measurements. Official Statement of The European Respiratory Society**. *Eur Respir J* 1995, **8**(3):492-506.
3. Grydeland TB, Dirksen A, Coxson HO, Pillai SG, Sharma S, Eide GE, Gulsvik A, Bakke PS: **Quantitative computed tomography: emphysema and airway wall thickness by sex, age and smoking**. *Eur Respir J* 2009, **34**(4):858-865.
4. **SAS/STAT(R) 9.2 User's Guide, Second Edition**  
[[http://support.sas.com/documentation/cdl/en/statug/63033/HTML/default/viewer.htm#statug\\_logistic\\_sect052.htm](http://support.sas.com/documentation/cdl/en/statug/63033/HTML/default/viewer.htm#statug_logistic_sect052.htm)]
5. **COPDGene GWAS Quality Control and Methodology**  
[[http://www.copdgene.org/sites/default/file/GWAS\\_QC\\_Methodology\\_20121115.pdf](http://www.copdgene.org/sites/default/file/GWAS_QC_Methodology_20121115.pdf)]
6. **R Core Team. R: A language and environment for statistical computing**. [<http://www.R-project.org/2012>]
7. Hartigan JA, Wong MA: **A K-means clustering algorithm**. *Applied Statistics* 1979, **28**:100-108.
8. **Prevalence of Overweight, Obesity, and Extreme Obesity Among Adults: United States, Trends 1960-1962 Through 2009-2010**.  
[[http://www.cdc.gov/nchs/data/hestat/obesity\\_adult\\_09\\_10/obesity\\_adult\\_09\\_10.htm](http://www.cdc.gov/nchs/data/hestat/obesity_adult_09_10/obesity_adult_09_10.htm)]
9. Ford ES, Mannino DM, Wheaton AG, Giles WH, Presley-Cantrell L, Croft JB: **Trends in the prevalence of obstructive and restrictive lung function among adults in the United States: findings from the National Health and Nutrition Examination surveys from 1988-1994 to 2007-2010**. *Chest* 2013, **143**(5):1395-1406.
10. Ford ES, Mannino DM, Zhao G, Li C, Croft JB: **Changes in mortality among US adults with COPD in two national cohorts recruited from 1971-1975 and 1988-1994**. *Chest* 2012, **141**(1):101-110.
11. Guerra S, Sherrill DL, Venker C, Ceccato CM, Halonen M, Martinez FD: **Morbidity and mortality associated with the restrictive spirometric pattern: a longitudinal study**. *Thorax* 2010, **65**(6):499-504.
12. Hickson DA, Liu J, Bidulescu A, Burchfiel CM, Taylor HA, Petrini MF: **Pericardial fat is associated with impaired lung function and a restrictive lung pattern in adults: the Jackson Heart Study**. *Chest* 2011, **140**(6):1567-1573.
13. Kohler D, Fischer J, Raschke F, Schonhofer B: **Usefulness of GOLD classification of COPD severity**. *Thorax* 2003, **58**(9):825.
14. Mannino DM, Doherty DE, Sonia Buist A: **Global Initiative on Obstructive Lung Disease (GOLD) classification of lung disease and mortality: findings from the Atherosclerosis Risk in Communities (ARIC) study**. *Respir Med* 2006, **100**(1):115-122.
15. Mannino DM, Ford ES, Redd SC: **Obstructive and restrictive lung disease and functional limitation: data from the Third National Health and Nutrition Examination**. *J Intern Med* 2003, **254**(6):540-547.
16. Mannino DM, McBurnie MA, Tan W, Kocabas A, Anto J, Vollmer WM, Buist AS: **Restricted spirometry in the Burden of Lung Disease Study**. *Int J Tuberc Lung Dis* 2012, **16**(10):1405-1411.
17. Soriano JB, Miravittles M, Garcia-Rio F, Munoz L, Sanchez G, Sobradillo V, Duran E, Guerrero D, Ancochea J: **Spirometrically-defined restrictive ventilatory defect: population variability and individual determinants**. *Prim Care Respir J* 2012, **21**(2):187-193.
18. Vaz Fragoso CA, Gill TM, McAvay G, Yaggi HK, Van Ness PH, Concato J: **Respiratory impairment and mortality in older persons: a novel spirometric approach**. *J Investig Med* 2011, **59**(7):1089-1095.
19. Wan ES, Hokanson JE, Murphy JR, Regan EA, Make BJ, Lynch DA, Crapo JD, Silverman EK: **Clinical and radiographic predictors of GOLD-unclassified smokers in the COPDGene study**. *Am J Respir Crit Care Med* 2011, **184**(1):57-63.
